# Supplementary material for: Laser-induced tuning of graphene field-effect transistors for pH sensing
Source: Royal Society of Chemistry journal article supplement (doi:10.1039/d3cp00359k), 2023-01-01
Supplement: d3cp00359k1.pdf [file d3cp00359k1.pdf]

# Supplementary Information: Laser-induced tuning of graphene field- effect transistors for pH sensing

Aku Lampinen,<sup>a</sup> Erich See,<sup>a</sup> Aleksei Emelianov,<sup>a</sup>  
Pasi Myllyperkiö,<sup>a</sup> Andreas Johansson,<sup>a,b</sup> Mika Pettersson\*<sup>a</sup>

<sup>a</sup> *Nanoscience centre, Department of Chemistry, University of Jyväskylä, Survantie 9,  
40500 Jyväskylä, Finland*

<sup>b</sup> *Nanoscience centre, Department of Physics, University of Jyväskylä, Survantie 9,  
40500 Jyväskylä, Finland*

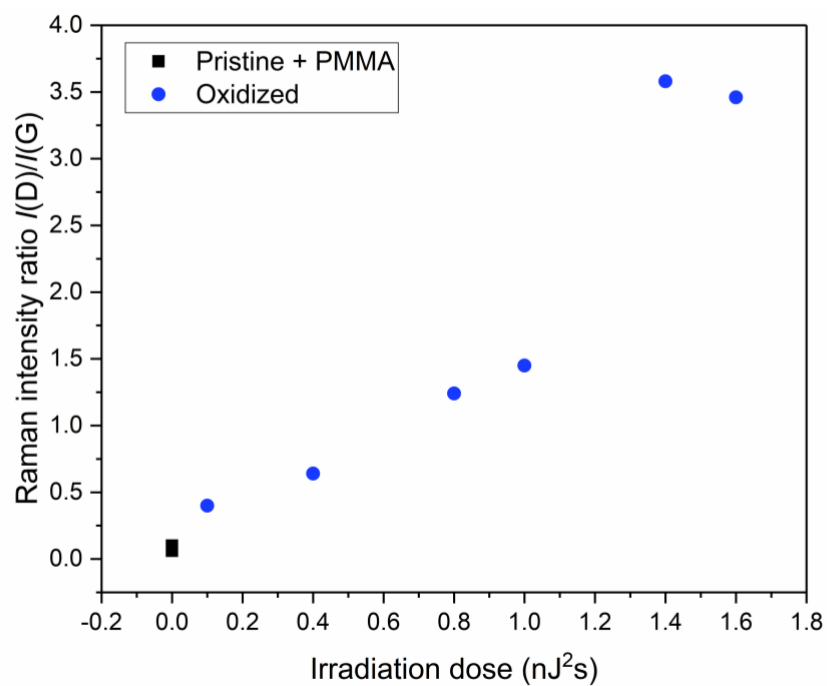

**Fig S1:** The dependency of the  $I(D)/I(G)$  ratio on the laser irradiation dosage used in 2PO with the reported other parameters. Notice that this graph is only valid for this work and cannot be generalized, as the oxidation level achieved with 2PO depends also on other conditions. (See chapter 2.2 of the article for the detailed list of parameters used)

**Table S1:** Fitting parameters of the Raman spectra for all the samples. Lorentzian peak shape was used for all the bands

| Sample $I(D)/I(G)$ ratio            |           | 0.06       | 0.07   | 0.10   | 0.40   | 0.64   | 1.24   | 1.45   | 3.46    | 3.58    |
|-------------------------------------|-----------|------------|--------|--------|--------|--------|--------|--------|---------|---------|
| Peak                                | Parameter |            |        |        |        |        |        |        |         |         |
| <b>Laser dose (nJ<sup>2</sup>s)</b> |           | 0.0        | 0.0    | 0.0    | 0.1    | 0.4    | 0.8    | 1.0    | 1.6     | 1.4     |
| <b>D</b>                            | Location  | 1345       | 1344   | 1343   | 1350   | 1348   | 1346   | 1346   | 1344    | 1344    |
|                                     | FWHM      | 26.93      | 40.00  | 40.00  | 23.18  | 22.56  | 21.06  | 20.16  | 30.30   | 20.69   |
|                                     | Area      | 1499       | 2040   | 2412   | 7891   | 11769  | 19446  | 17674  | 76415   | 45617   |
|                                     | Height    | 35.44      | 32.48  | 38.38  | 216.72 | 332.06 | 587.90 | 558.11 | 1605.57 | 1403.57 |
| <b>G</b>                            | Location  | 1591       | 1583   | 1584   | 1602   | 1599   | 1596   | 1588   | 1590    | 1586    |
|                                     | FWHM      | 12.37      | 16.81  | 20.43  | 11.61  | 12.75  | 14.23  | 18.28  | 33.16   | 21.99   |
|                                     | Area      | 11847      | 11441  | 12323  | 9844   | 10438  | 10603  | 11081  | 24178   | 13552   |
|                                     | Height    | 609.75     | 433.25 | 383.98 | 539.64 | 521.26 | 474.32 | 385.98 | 464.12  | 392.40  |
| <b>D'</b>                           | Location  | 1618       | 1625   | 1624   | 1627   | 1627   | 1625   | 1627   | 1620    | 1623    |
|                                     | FWHM      | 9.30       | 6.31   | 20.00  | 4.20   | 8.90   | 6.70   | 11.26  | 17.54   | 13.58   |
|                                     | Area      | 352        | 139    | 661    | 103    | 422    | 489    | 1096   | 6815    | 3647    |
|                                     | Height    | 24.06      | 14.03  | 21.04  | 15.54  | 30.18  | 46.49  | 61.99  | 247.31  | 170.98  |
| <b>2D</b>                           | Location  | 2683       | 2675   | 2678   | 2692   | 2689   | 2686   | 2685   | 2682    | 2680    |
|                                     | FWHM      | 31.23      | 33.00  | 32.17  | 32.47  | 35.68  | 34.47  | 31.76  | 42.36   | 30.89   |
|                                     | Area      | 28658      | 36463  | 30265  | 17030  | 21153  | 20741  | 27539  | 19579   | 29311   |
|                                     | Height    | 584.18     | 703.33 | 598.90 | 333.90 | 377.39 | 383.10 | 552.05 | 294.27  | 604.10  |
| <b>Sensitivity (mV/pH)</b>          |           | 20.0 ± 0.9 | 21 ± 2 | 22 ± 2 | 20 ± 4 | 19 ± 2 | 22 ± 3 | 25 ± 3 | 24 ± 1  | 25 ± 2  |

a)

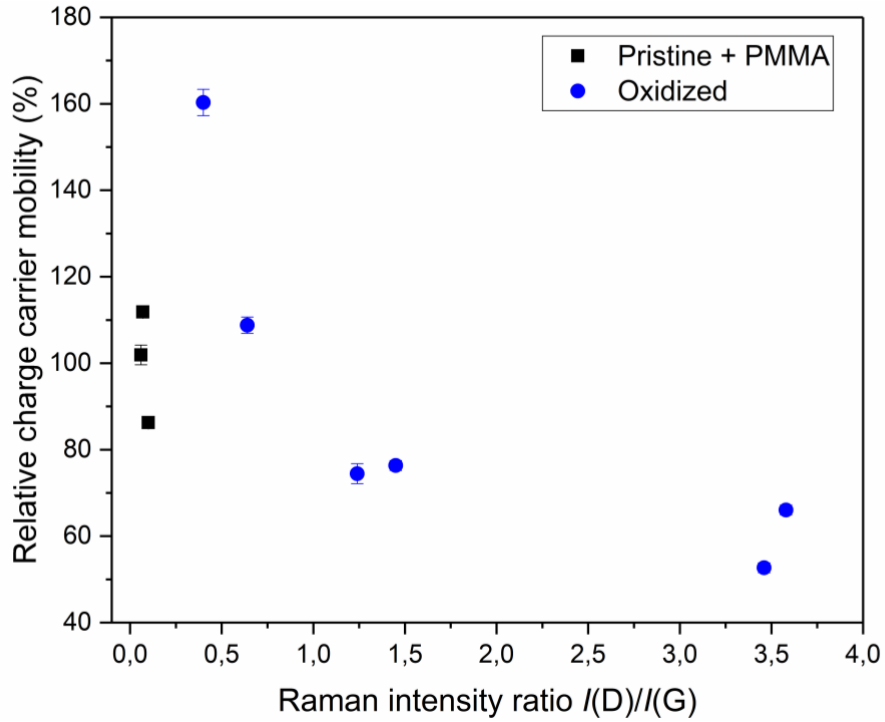

b)

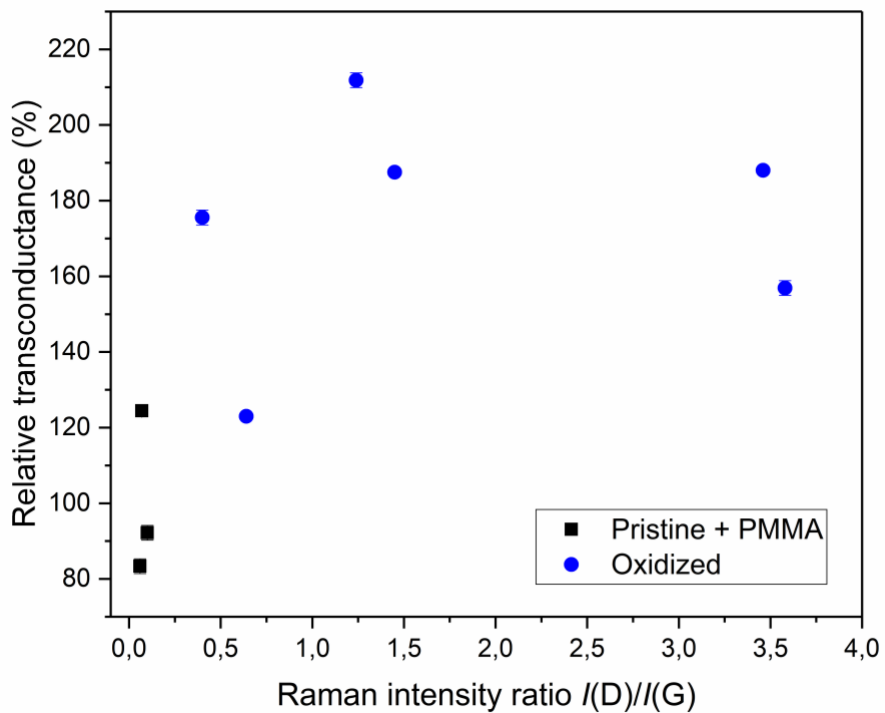

**Fig S2:** a) The maximum relative transconductance and b) the corresponding relative charge carrier mobility when  $U_G < U_{Dirac}$  vs. Raman intensity ratio  $I(D)/I(G)$ , which reflects the oxidation level. Each point is an average of all the repetitions measured with an individual device and the error bars represent the standard error of the mean. Values have been normalized so that the average of the pristine samples is 100 %.

a)

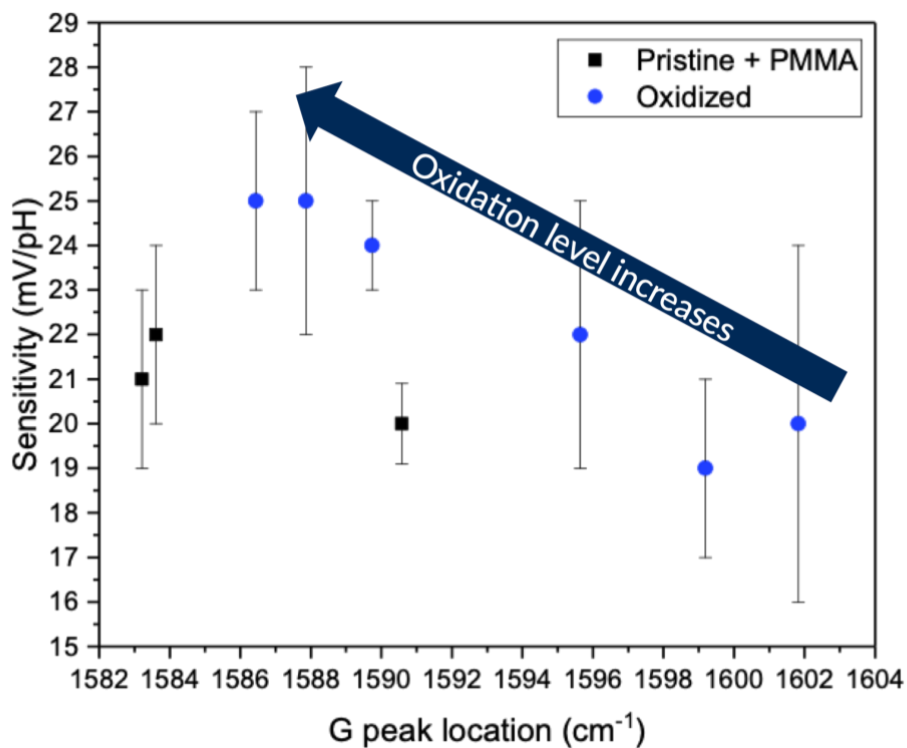

b)

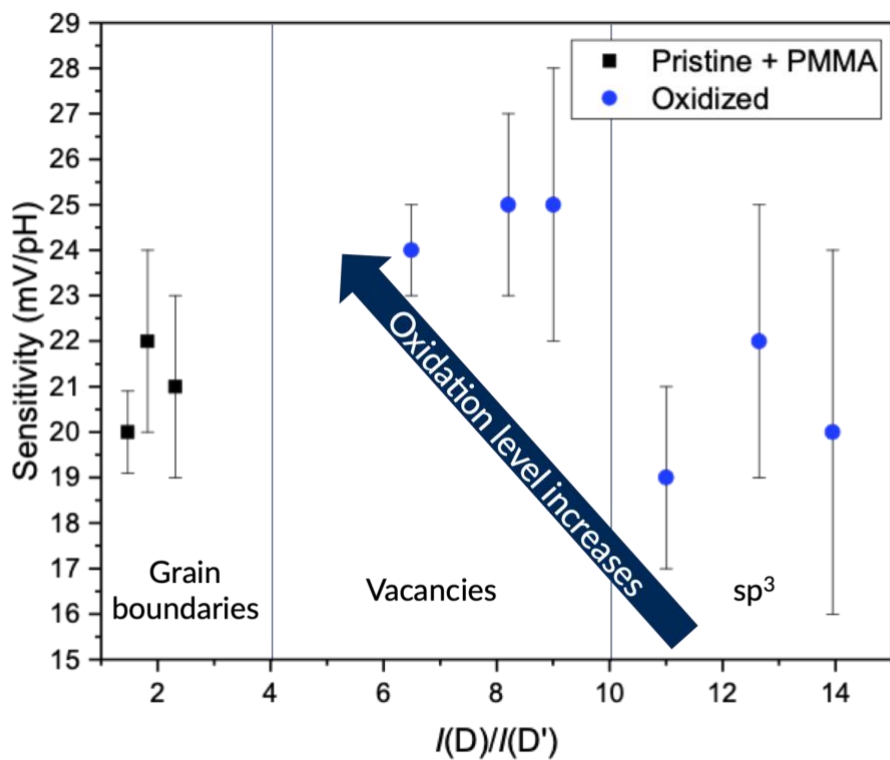

**Fig S3:** a) Sensitivity vs. G peak location and b) sensitivity vs.  $I(D)/I(D')$ . The trend of the oxidation level for the oxidized samples is indicated with an arrow. The regions where different defect types are dominant have been named and approximately separated with lines.<sup>3-5</sup>

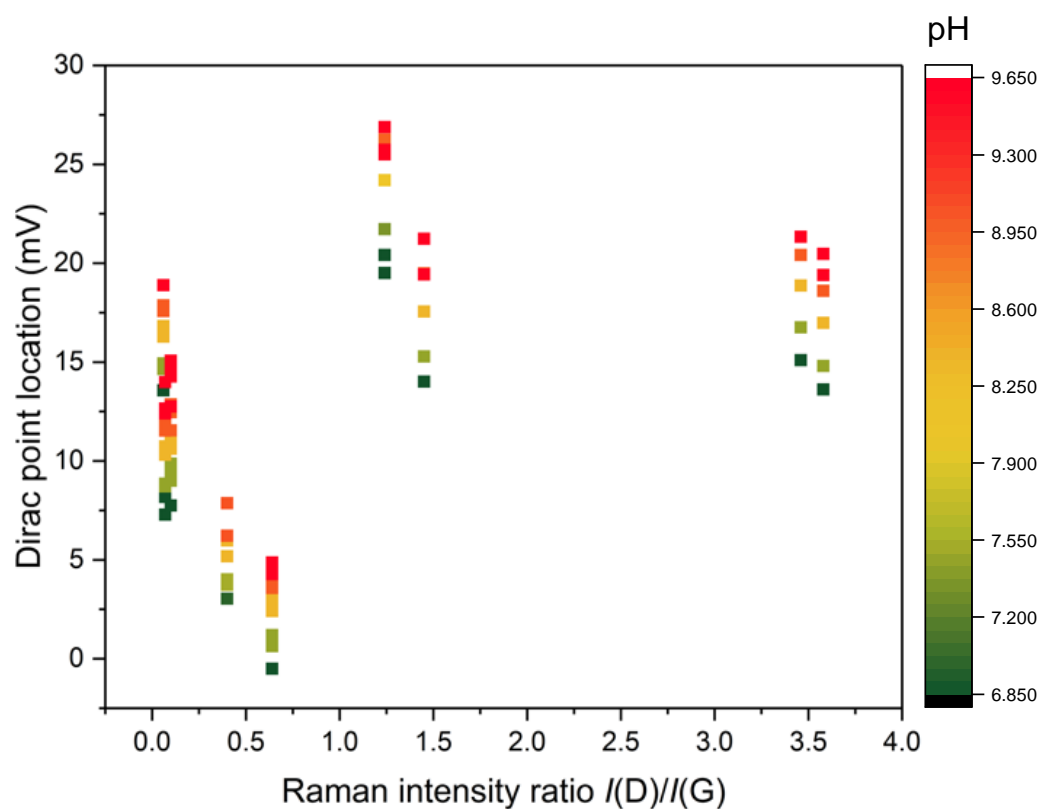

**Fig S4:** Scatter plot of all the data used for the pH sensitivity measurements in this publication with the Dirac point location plotted against the  $I(D)/I(G)$  ratio at different pH.

**Table S2:** Sample history for all the samples used and related identification tags. The letter in the ID refers to the chip on which the device was on and the number to the device

| Sample $I(D)/I(G)$ | ID |
|--------------------|----|
| 0.06               | A1 |
| 0.07               | B1 |
| 0.10               | B2 |
| 0.40               | C1 |
| 0.64               | D1 |
| 1.24               | E1 |
| 1.45               | A1 |
| 3.46               | B2 |
| 3.58               | A2 |

**Table S3:** Raw data for all of the pH measurements used in this study

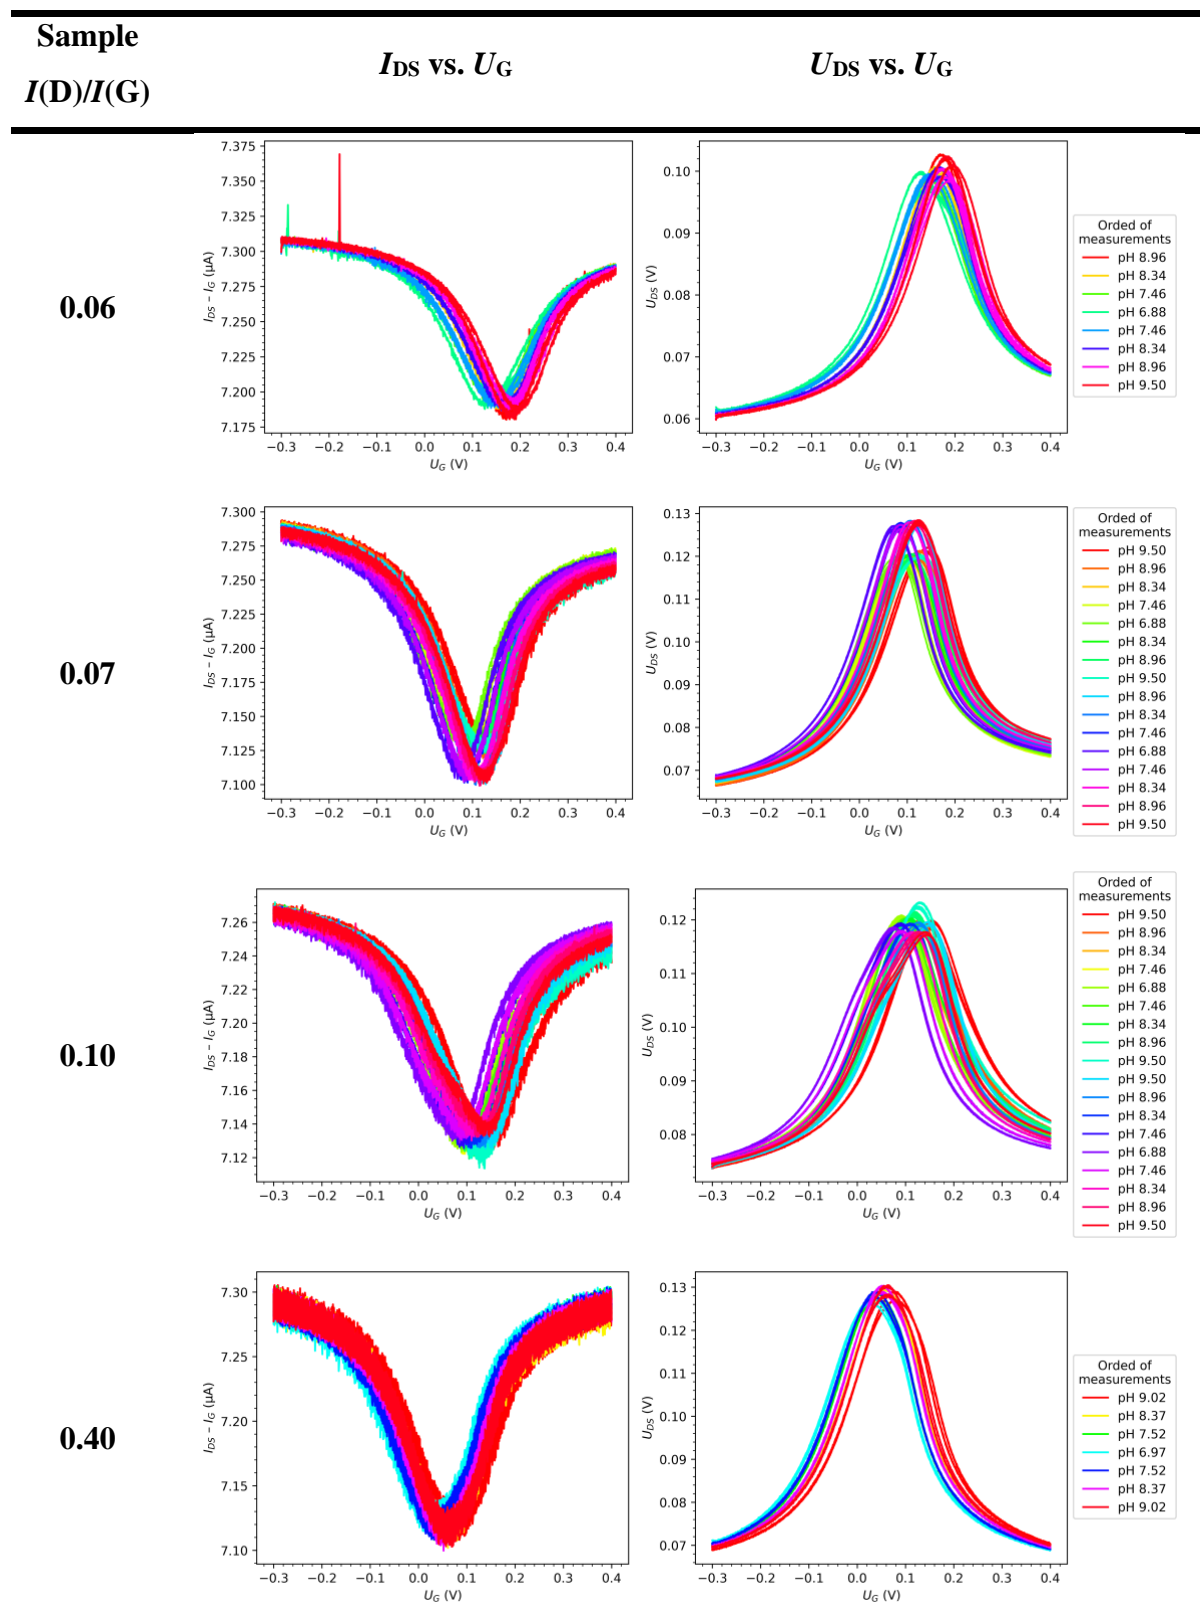

0.64

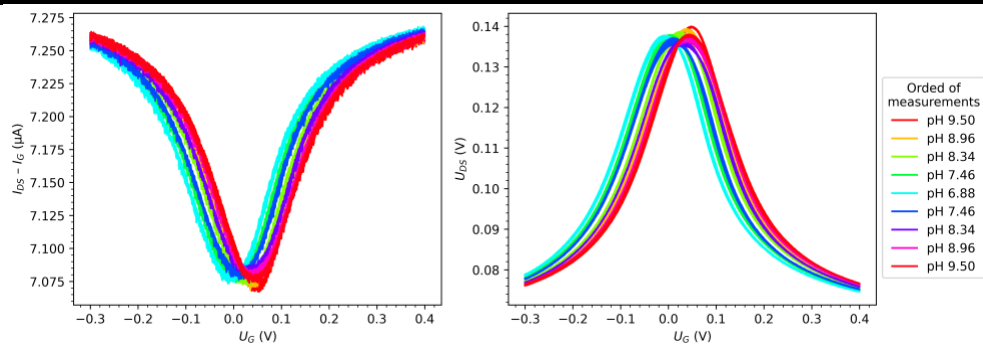

1.24

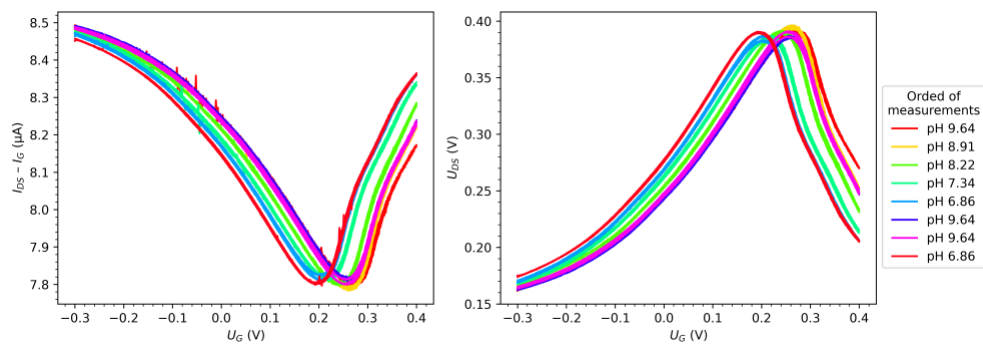

1.45

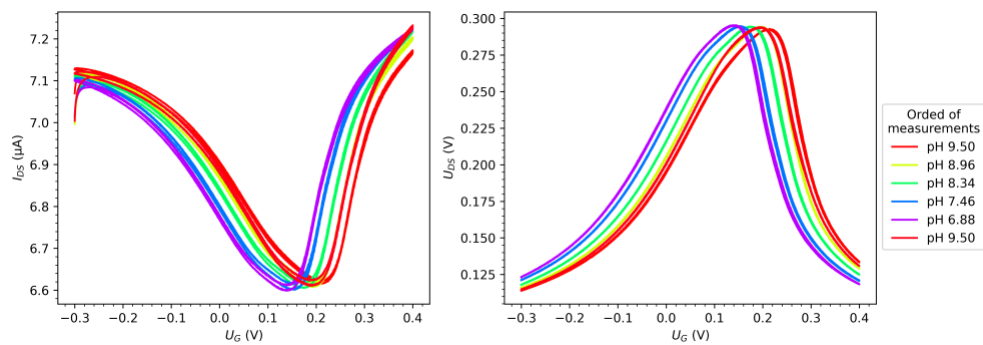

3.46

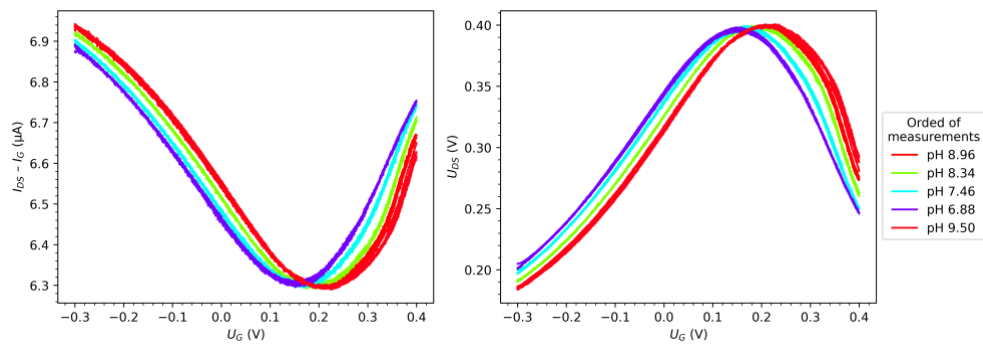

3.58

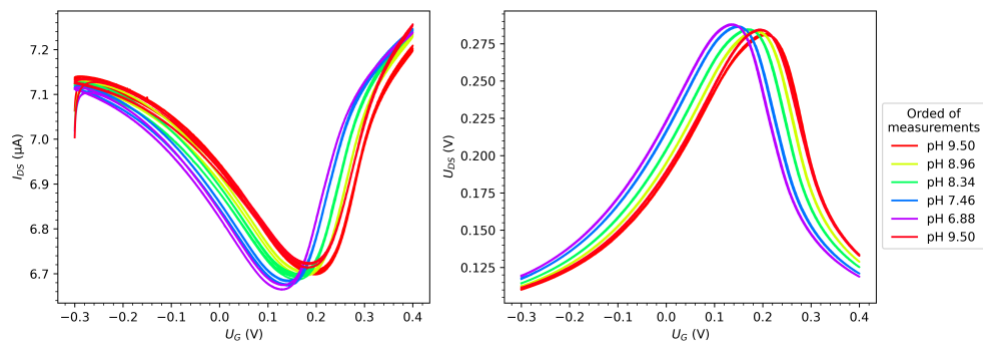



Sample 0.06  $y = (-0.002 \pm 0.007) + (0.02 \pm 0.0009)x$   
 $R^2 = 0.989829$   
pH dependency

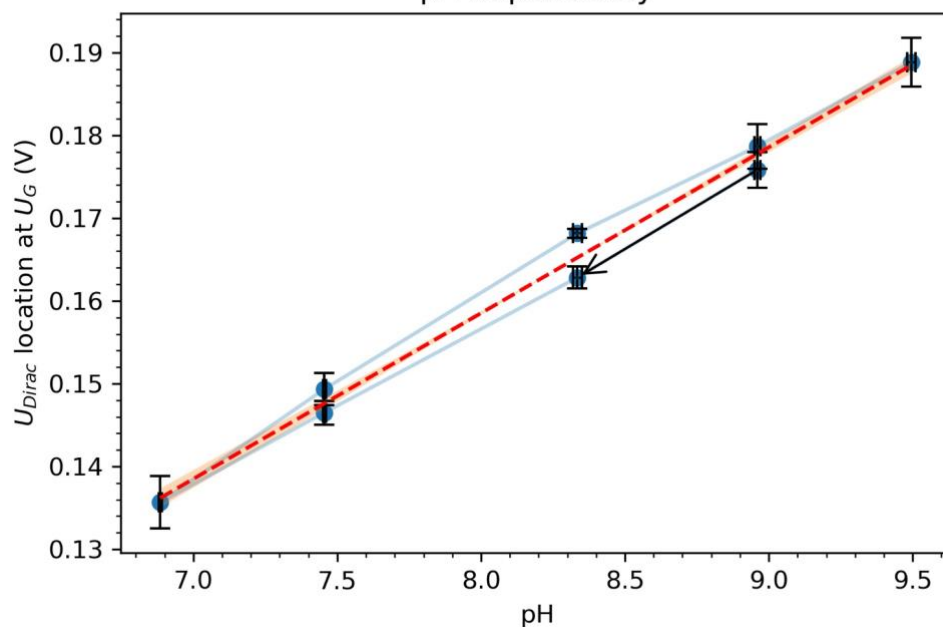

Sample 0.07  $y = (-0.07 \pm 0.02) + (0.021 \pm 0.002)x$   
 $R^2 = 0.944998$   
pH dependency

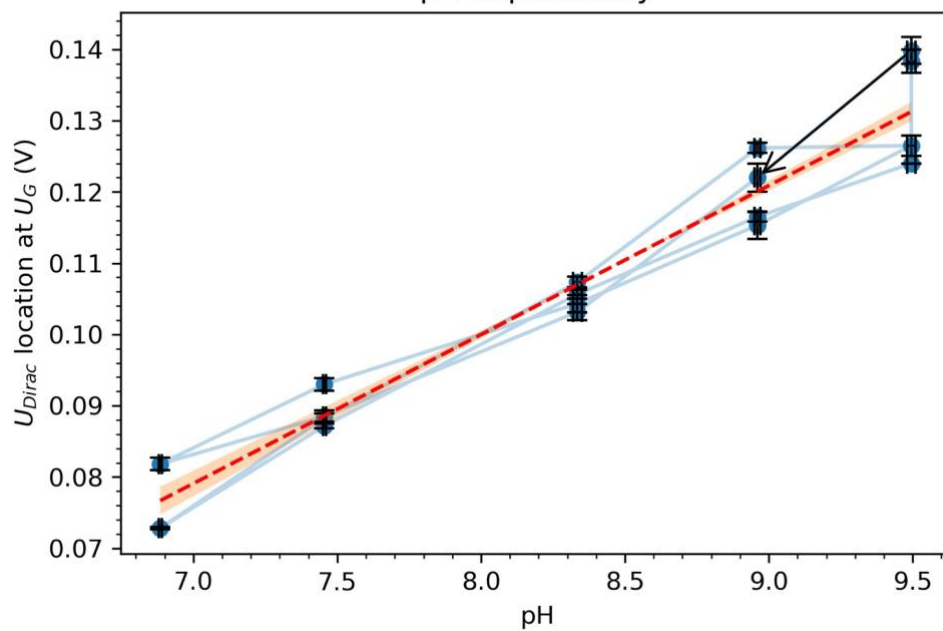

Sample 0.10  $y = (-0.07 \pm 0.02) + (0.022 \pm 0.002)x$   
 $R^2 = 0.901343$   
pH dependency

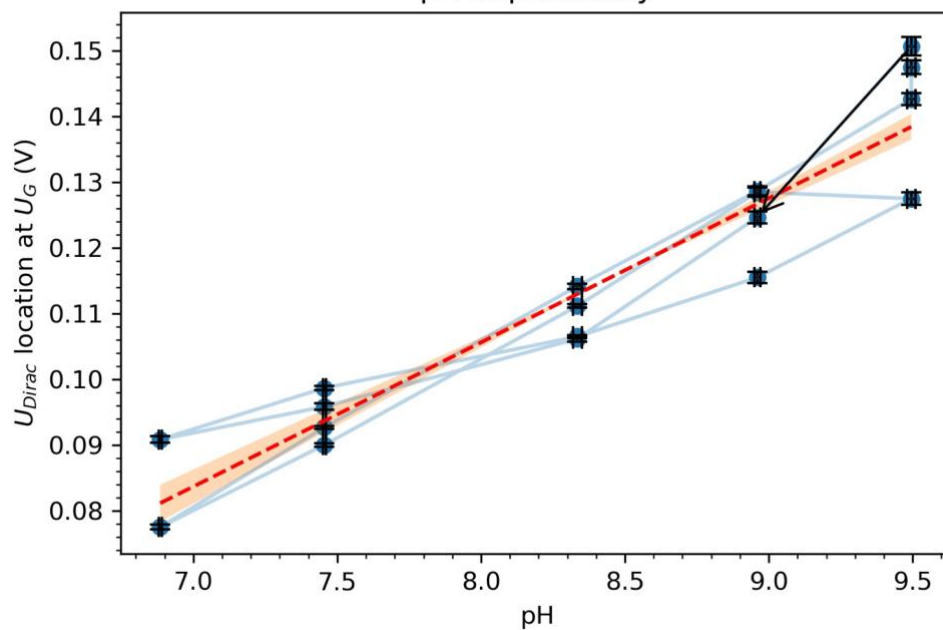

Sample 0.40  $y = (-0.11 \pm 0.03) + (0.02 \pm 0.004)x$   
 $R^2 = 0.894569$   
pH dependency

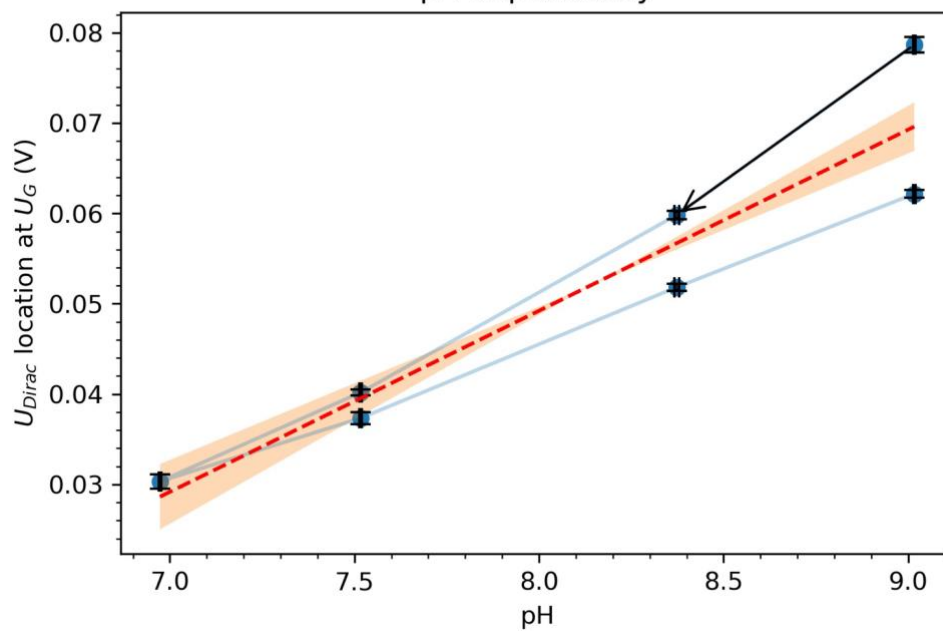

Sample 0.64  $y = (-0.13 \pm 0.01) + (0.019 \pm 0.002)x$   
 $R^2 = 0.973349$   
pH dependency

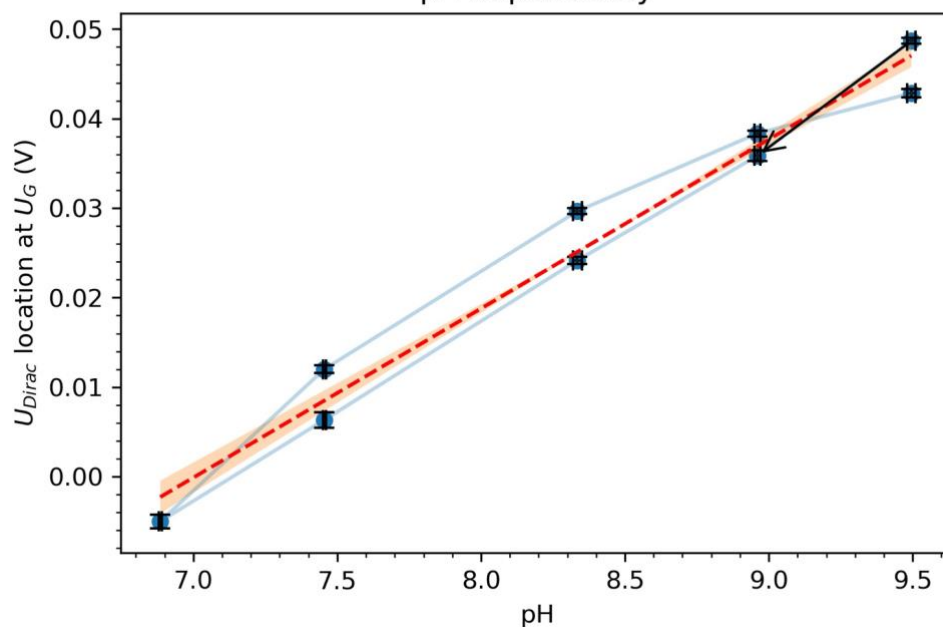

Sample 1.24  $y = (0.06 \pm 0.03) + (0.022 \pm 0.003)x$   
 $R^2 = 0.909213$   
pH dependency

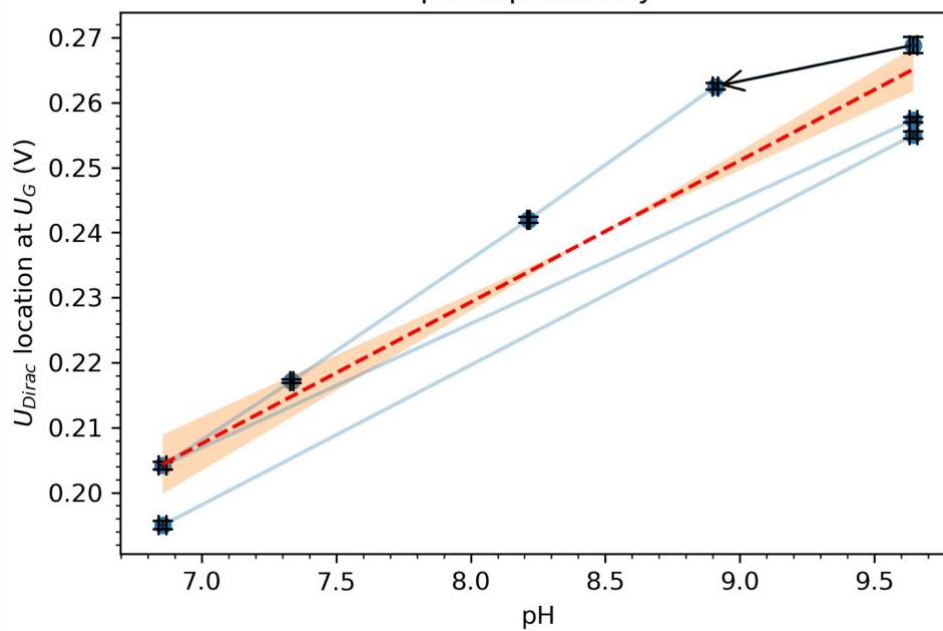

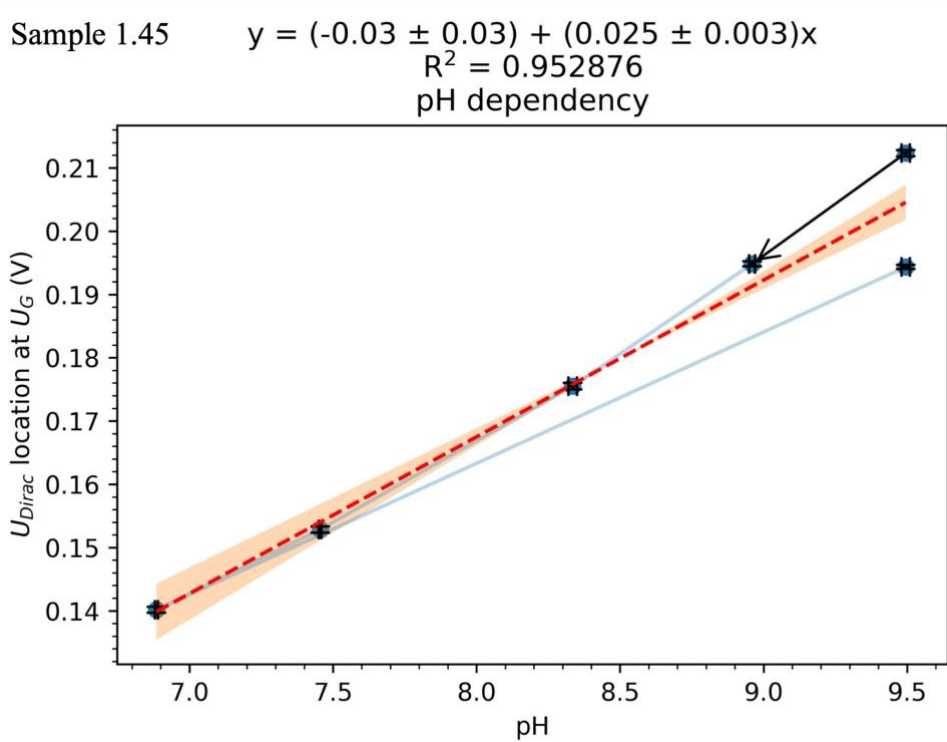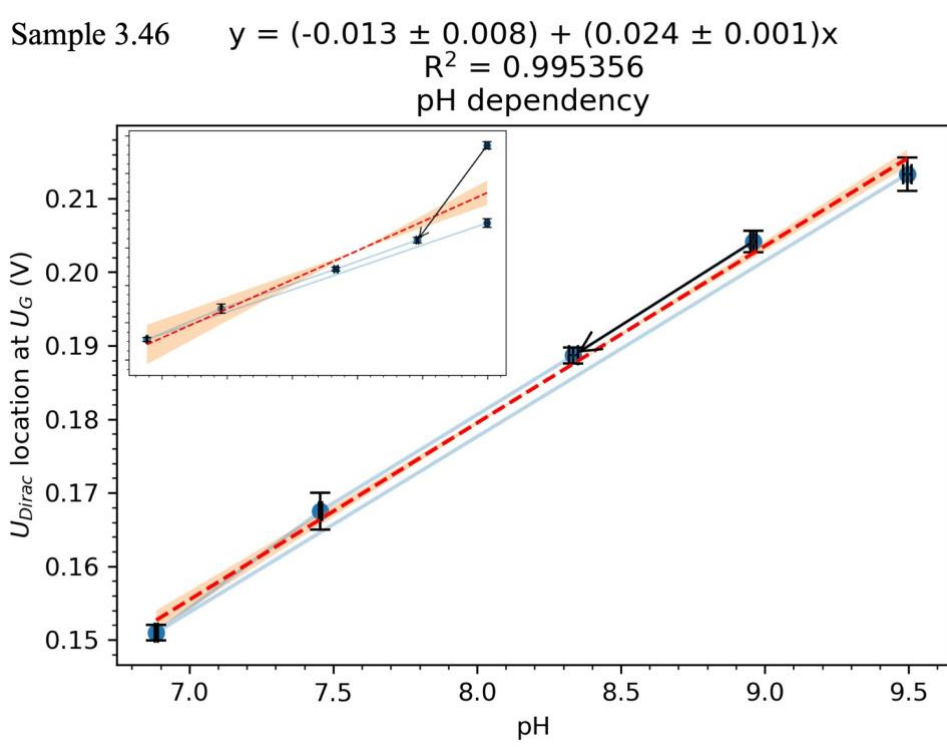

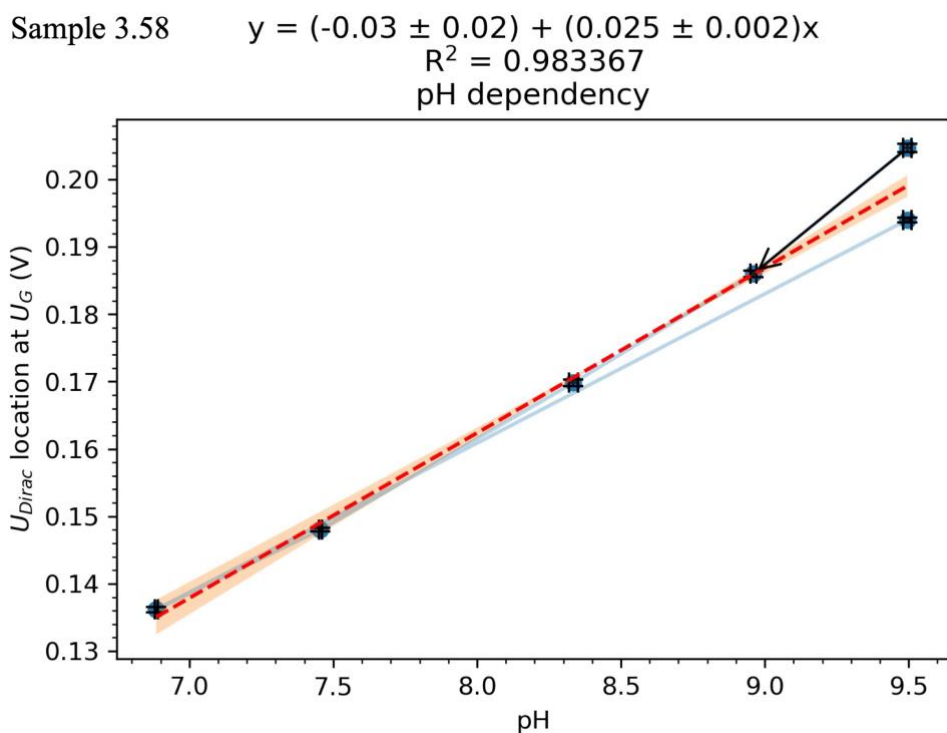

**Fig S5:** All the pH dependency fittings with their corresponding fitted linear equation and parameters. The sample is identified with their  $I(D)/I(G)$  ratio in the top left corner of each graph. Sample 3.46 has an inset showing the left-out outlier point. The error bars represent the standard error of the mean for all the  $I_{DS}-U_G$  scans at the one pH value. The arrow indicates the measurement order by pointing from the first point to the second, followed by the line in order.

## Supplementary references

- 1 J. E. Lee, G. Ahn, J. Shim, Y. S. Lee and S. Ryu, *Nat. Commun.*, 2012, **3**, 1–22.
- 2 V. M. Hiltunen, P. Koskinen, K. K. Mentel, J. Manninen, P. Myllyperkiö, M. Pettersson and A. Johansson, *npj 2D Mater. Appl.*, 2021, **5**, 1–7.
- 3 A. Eckmann, A. Felten, A. Mishchenko, L. Britnell, R. Krupke, K. S. Novoselov and C. Casiraghi, *Nano Lett.*, 2012, **12**, 3925–3930.
- 4 A. V. Emelianov, D. Kireev, D. D. Levin and I. I. Bobrinetskiy, *Appl. Phys. Lett.*, 2016, **109**, 173101.
- 5 H. S. Song, S. L. Li, H. Miyazaki, S. Sato, K. Hayashi, A. Yamada, N. Yokoyama and K. Tsukagoshi, *Sci. Reports 2012 21*, 2012, **2**, 1–6.
